# Supplementary material for: Rapidly tuning the electrocatalytic activity of perovskite oxides by plasma treatment
Source: Royal Society of Chemistry journal article supplement (doi:10.1039/d3ta05214a), 2023-01-01
Supplement: d3ta05214a1.pdf [file d3ta05214a1.pdf]

## Supporting Information

### **Rapidly tuning electrocatalytic activity of perovskite oxides by plasma treatment**

Zhu Sun,<sup>\*,1,3,5</sup> Weiwei Fan,<sup>\*,2,4,5</sup> Tianquan Lin<sup>1,3</sup>

<sup>1</sup>School of Materials Science and Engineering, Shanghai Jiao Tong University, 800 Dongchuan Road, Shanghai, 200240, China

<sup>2</sup>Key Laboratory of Energy Thermal Conversion and Control of Ministry of Education, School of Energy and Environment, Southeast University, Nanjing 210096, China

<sup>3</sup>Zhangjiang Institute for Advanced Study (ZIAS), Shanghai Jiao Tong University, Shanghai, 201210, China

<sup>4</sup>Department of Nuclear Science and Engineering, Massachusetts Institute of Technology, Cambridge 02139, USA

<sup>5</sup>These authors contributed equally to this work.

### Four fundamental states of matter

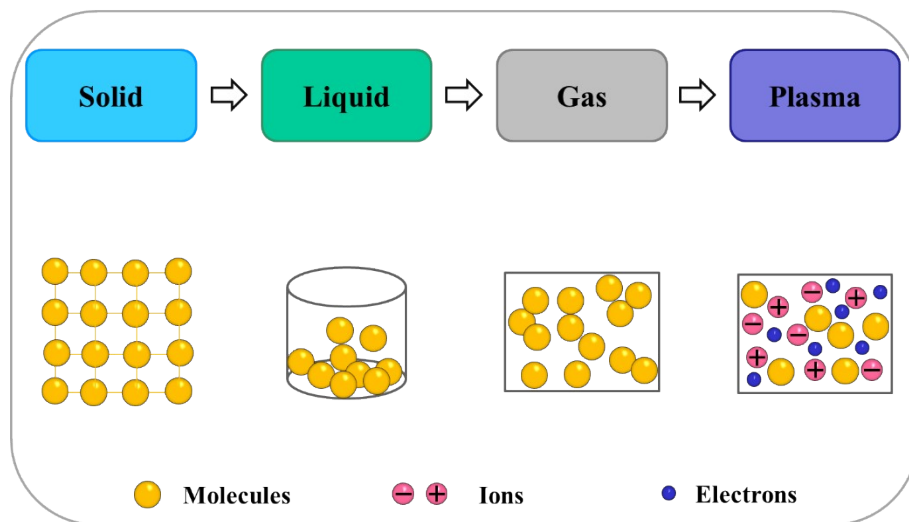

**Figure S1.** Illustration of the four fundamental states of matter.

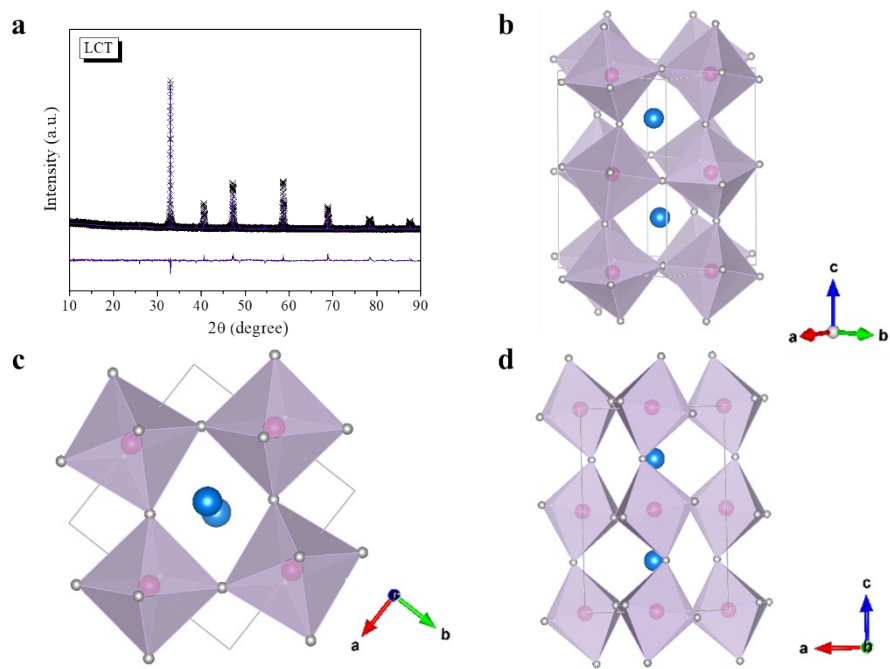

**Figure S2.** **a**, Rietveld refinement XRD profile of the as-synthesized LCT oxide. **b,c,d**, Crystal structural of LCT oxide at different views, where blue spheres denote La/Ca, pink spheres denote Ti, grey spheres denote O.

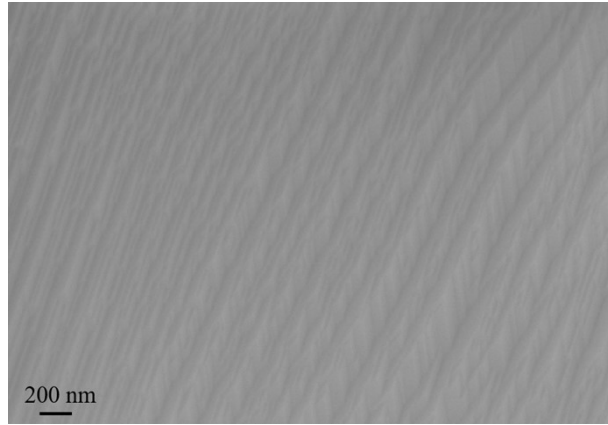

**Figure S3.** SEM image of the LCTN after thermal treatment at 350 °C for 1h in H<sub>2</sub>.

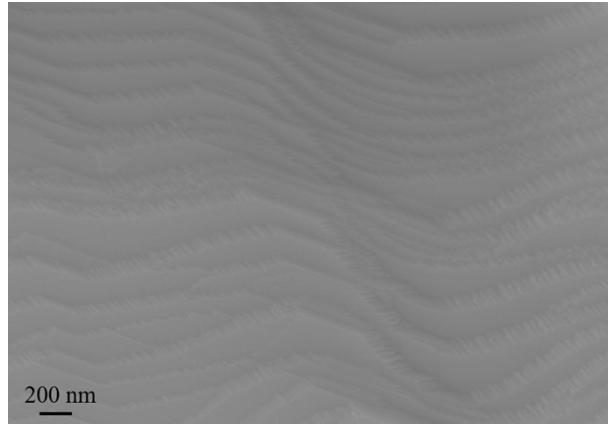

**Figure S4.** SEM image of the plasma-treated LCT.

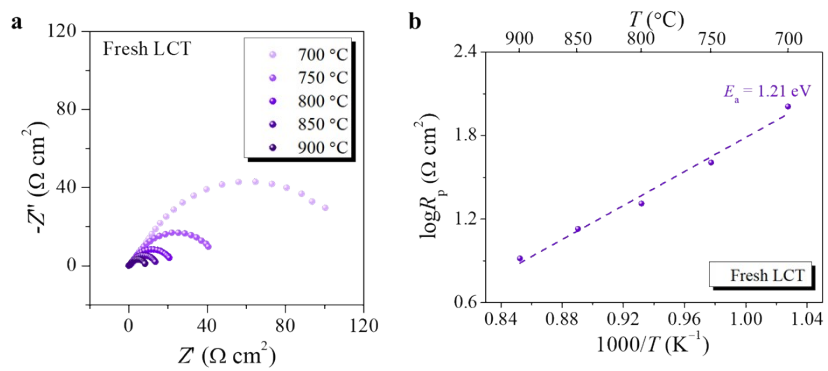

**Figure S5. a,** Nyquist plots of the fresh LCT electrode collected from 700 to 900 °C in hydrogen atmosphere under OCV conditions. **b,** Arrhenius plots of  $R_p$  for fresh LCT electrode.

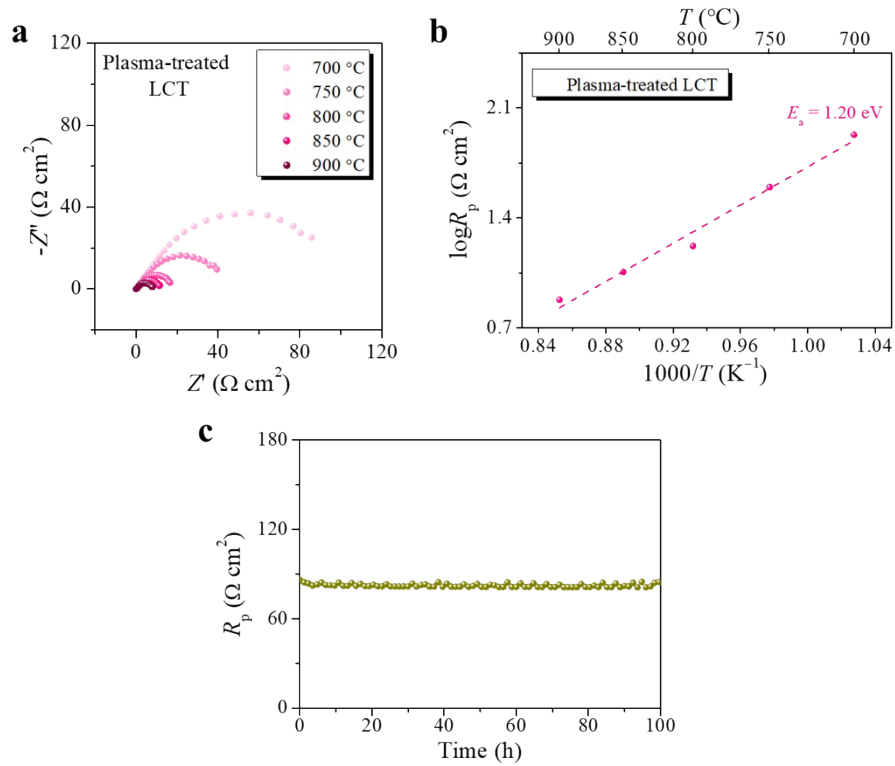

**Figure S6. a**, Nyquist plots of the plasma-treated LCT collected from 700 to 900 °C in hydrogen atmosphere under OCV conditions. **b**, Arrhenius plots of  $R_p$  of the plasma-treated LCT electrode. **c**, Time dependence of  $R_p$  collected at 700 °C in hydrogen atmosphere for the plasma-treated LCT.

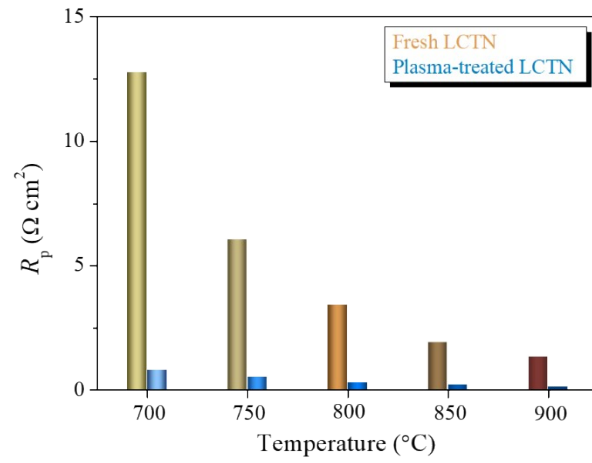

**Figure S7.** Comparison of  $R_p$  between the fresh LCTN and the plasma-treated LCTN at different temperatures.



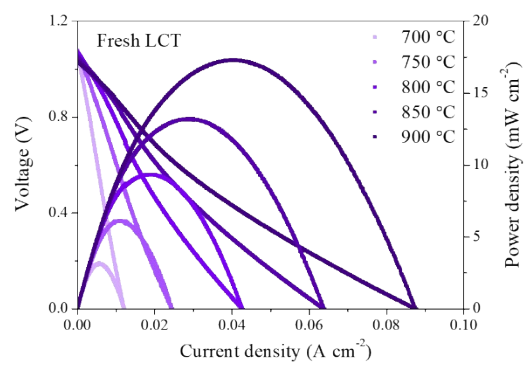

**Figure S8.** Voltage and power density versus current density for the cell LCT(fresh)|SSZ|LSM-SSZ measured from 700 to 900 °C using humidified H<sub>2</sub> as fuel and air as oxidant.

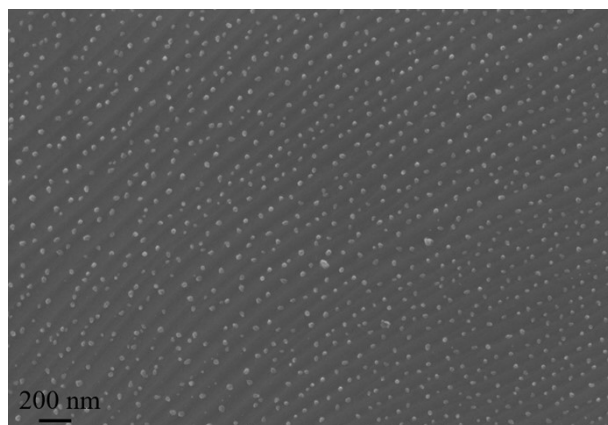

**Figure S9.** SEM image of the plasma-treated LCTN after stability test.

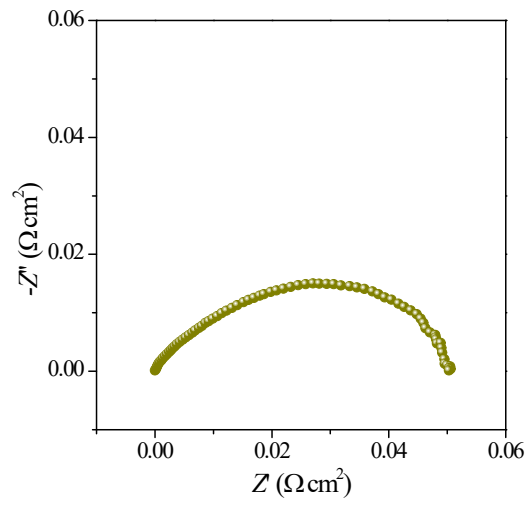

**Figure S10.** Nyquist plots of the half-cell LSM-SSZ|SSZ|LSM-SSZ collected at 900 °C under OCV condition in air.

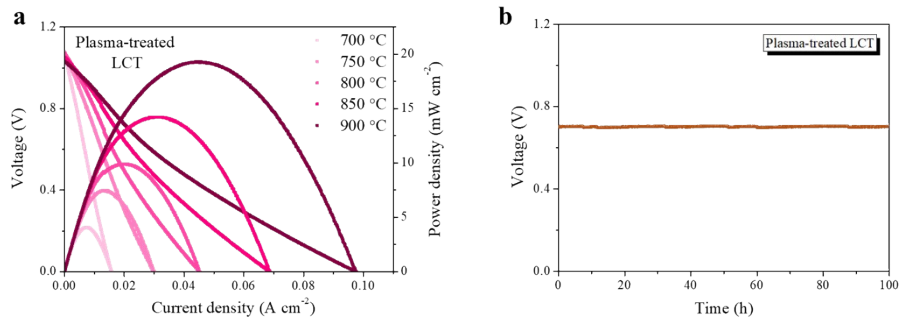

**Figure S11. a**, Voltage and power density versus current density for the cell LCT(plasma-treated)|SSZ|LSM-SSZ measured from 700 to 900 °C using humidified H<sub>2</sub> as fuel and air as oxidant. **b**, Cell voltage as a function of testing time for the single cell LCT(plasma-treated)|SSZ|LSM-SSZ at 700 °C.

**Activation energy calculation:**

Activation energy ( $E_a$ ), associating with the electrochemical reaction mechanism including the processes of gas adsorption, dissociation and diffusion, can be calculated by the following equation.

$$\log R_p = \log R_0 - \frac{E_a}{2.303RT} \quad (1)$$

where  $R_0$  is the pre-exponential factor,  $R$  is the gas constant ( $8.314 \text{ J mol}^{-1} \text{ K}^{-1}$ ),  $T$  is the absolute temperature (K).

**Table S1. Refined structural parameters for LCTN obtained by fitting of powder XRD data at room temperature.**

| Atoms, sites | Parameters            | LCTN      |
|--------------|-----------------------|-----------|
|              | Space group           | Pbnm (62) |
|              | $a$ (Å)               | 5.4642(4) |
|              | $b$ (Å)               | 7.7339(4) |
|              | $c$ (Å)               | 5.4633(7) |
|              | $V$ (Å <sup>3</sup> ) | 230.87    |
|              | $x$                   | 0.4670    |
|              | $y$                   | 0.2500    |
| La, 4c       | $z$                   | 0.0072    |
|              | Occupancy             | 0.43      |
|              | $x$                   | 0.4670    |
|              | $y$                   | 0.2500    |
| Ca, 4c       | $z$                   | 0.0072    |
|              | Occupancy             | 0.37      |
|              | $x$                   | 0         |
|              | $y$                   | 0         |
| Ti, 4a       | $z$                   | 0         |
|              | Occupancy             | 0.94      |
|              | $x$                   | 0         |
|              | $y$                   | 0         |
| Ni, 4a       | $z$                   | 0         |
|              | Occupancy             | 0.06      |
|              | $x$                   | 0.5107    |
|              | $y$                   | 0.2500    |
| O1, 4c       | $z$                   | 0.5722    |
|              | Occupancy             | 1         |
|              | $x$                   | 0.2158    |
|              | $y$                   | 0.0346    |
| O1, 8d       | $z$                   | 0.2826    |
|              | Occupancy             | 1         |
|              | $R_{wp}$              | 16.68     |
|              | $R_p$                 | 12.54     |
|              | $\chi^2$              | 4.09      |

**Table S2. Refined structural parameters for LCT obtained by fitting of powder XRD data at room temperature.**

| Atoms, sites | Parameters            | LCT       |
|--------------|-----------------------|-----------|
|              | Space group           | Pbnm (62) |
|              | $a$ (Å)               | 5.4587(5) |
|              | $b$ (Å)               | 7.7261(5) |
|              | $c$ (Å)               | 5.4562(4) |
|              | $V$ (Å <sup>3</sup> ) | 230.11    |
|              | $x$                   | 0.4670    |
|              | $y$                   | 0.2500    |
| La, 4c       | $z$                   | 0.0072    |
|              | Occupancy             | 0.43      |
|              | $x$                   | 0.4670    |
|              | $y$                   | 0.2500    |
| Ca, 4c       | $z$                   | 0.0072    |
|              | Occupancy             | 0.37      |
|              | $x$                   | 0         |
|              | $y$                   | 0         |
| Ti, 4a       | $z$                   | 0         |
|              | Occupancy             | 1         |
|              | $x$                   | 0.5107    |
|              | $y$                   | 0.2500    |
| O1, 4c       | $z$                   | 0.5722    |
|              | Occupancy             | 1         |
|              | $x$                   | 0.2158    |
|              | $y$                   | 0.0346    |
| O1, 8d       | $z$                   | 0.2826    |
|              | Occupancy             | 1         |
|              | $R_{wp}$              | 14.83     |
|              | $R_p$                 | 10.19     |
|              | $\chi^2$              | 3.01      |

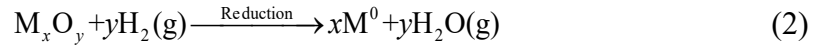

**Table S3** Thermodynamic parameters of reducing the corresponding oxide to metal at 900 °C

| Metal oxides                   | $\Delta H$ (kJ) | $\Delta S$ (J K <sup>-1</sup> ) | $\Delta G$ (kJ) | Equilibrium constant K |
|--------------------------------|-----------------|---------------------------------|-----------------|------------------------|
| La <sub>2</sub> O <sub>3</sub> | 1041.806        | 110.115                         | 912.625         | 2.301E-41              |
| CaO                            | 395.428         | 56.933                          | 328.637         | 2.324E-15              |
| TiO <sub>2</sub>               | 445.167         | 67.578                          | 365.888         | 5.098E-17              |
| NiO                            | -14.070         | 30.238                          | -49.544         | 1.607E+02              |



**Table S4** Comparison of peak power density among different nanoparticle-decorated materials

| Host oxide                                                                                      | Exsolved particle        | Size (nm) | Exsolving time (h) | PPD ( $\text{W cm}^{-2}$ ) |
|-------------------------------------------------------------------------------------------------|--------------------------|-----------|--------------------|----------------------------|
| LCTN (this work)                                                                                | Ni                       | 16        | 0.25               | 1.1                        |
| $(\text{Pr}_{0.4}\text{Sr}_{0.6})_3(\text{Fe}_{0.85}\text{Mo}_{0.15})_2\text{O}_7$ <sup>1</sup> | Co-Fe                    | 80        | 2                  | 0.5                        |
| $(\text{LaSr})_{0.9}\text{Fe}_{0.9}\text{Cu}_{0.1}\text{O}_4$ <sup>2</sup>                      | Cu                       | 50        | 10                 | 0.57                       |
| $\text{La}_{1.2}\text{Sr}_{0.8}\text{Mn}_{0.4}\text{Fe}_{0.6}\text{O}_{4-\delta}$ <sup>3</sup>  | $\text{Fe}_3\text{Co}_2$ | 30        | 20                 | 0.63                       |
| $\text{La}_{0.95}\text{Fe}_{0.80}\text{Ni}_{0.05}\text{Ti}_{0.15}\text{O}_3$ <sup>4</sup>       | Ni                       | 25        | 5                  | 0.6                        |
| $\text{Cu}_{1-x}\text{Ni}_x\text{Fe}_2\text{O}_4$ <sup>5</sup>                                  | Cu-Fe-Ni                 | 60        | 1                  | 0.67                       |
| $\text{La}_{0.8}\text{Sr}_{1.2}\text{Fe}_{0.9}\text{Co}_{0.1}\text{O}_{4+\delta}$ <sup>6</sup>  | Co                       | 10        | 20                 | 0.24                       |
| $\text{La}_{0.7}\text{Sr}_{0.3}\text{CrO}_3$ <sup>7</sup>                                       | Ni                       | 20        | 4                  | 0.31                       |

## References

- 1 Liu, S. B., Chuang, K. T. & Luo, J. L. Double-layered perovskite anode with in situ exsolution of a Co–Fe alloy to cogenerate ethylene and electricity in a proton-conducting ethane fuel cell. *ACS Catalysis* **6**, 760-768 (2015).
- 2 Fu, L. et al. Exsolution of Cu nanoparticles in  $(\text{LaSr})_{0.9}\text{Fe}_{0.9}\text{Cu}_{0.1}\text{O}_4$  Ruddlesden-Popper oxide as symmetrical electrode for solid oxide cells. *Applied Surface Science* **511**, 145525 (2020).
- 3 Li, H. D. et al. Exsolved alloy nanoparticles decorated Ruddlesden–Popper perovskite as sulfur-tolerant anodes for solid oxide fuel cells. *Energy & Fuels* **34**, 11449-11457 (2020).
- 4 Ni, C. S. et al. A B-site doped perovskite ferrate as an efficient anode of a solid oxide fuel cell with in situ metal exsolution. *Journal of Materials Chemistry A* **7**, 26944-26953 (2019).
- 5 Kang, B. S., Matsuda, J. & Ishihara, T. Cu–Fe–Ni nano alloy particles obtained by exsolution from  $\text{Cu}(\text{Ni})\text{Fe}_2\text{O}_4$  as active anode for SOFCs. *Journal of Materials Chemistry A* **7**, 26105-26115 (2019).
- 6 Zhou, J. et al. In situ growth of nanoparticles in layered perovskite  $\text{La}_{0.8}\text{Sr}_{1.2}\text{Fe}_{0.9}\text{Co}_{0.1}\text{O}_{4-\delta}$  as an active and stable electrode for symmetrical solid oxide fuel cells. *Chemistry of Materials* **28**, 2981-2993 (2016).
- 7 Sun, Y. F. et al. A-site deficient perovskite: the parent for in situ exsolution of highly active, regenerable nano-particles as SOFC anodes. *Journal of Materials Chemistry A* **3**, 11048-11056 (2015).
